# Supplementary material for: Exploring Deep Learning for Complex Trait Genomic Prediction in Polyploid Outcrossing Species
Source: PubMed Central journal article supplement (PMC7015897; doi:10.3389/fpls.2020.00025), 2020-02-06

## *Supplementary Material*

### **Exploring deep learning for complex trait genomic prediction in polyploid outcrossing species**

**L.M. Zingaretti<sup>1\*</sup>, S.A. Gezan<sup>2</sup>, L.F. Ferrão<sup>3</sup>, L.F. Osorio<sup>4</sup>, A. Monfort<sup>1,5</sup>, P.R. Muñoz<sup>3</sup>, V.M. Whitaker<sup>4</sup>, M. Pérez-Enciso<sup>1,6\*</sup>**

<sup>1</sup> Centre for Research in Agricultural Genomics (CRAG), CSIC-IRTA-UAB-UB Consortium, 08193 Bellaterra, Barcelona, Spain

<sup>2</sup> School of Forest Resources and Conservation, University of Florida, 363 Newins-Ziegler Hall, PO Box 110410, Gainesville, FL 32611-0410, USA

<sup>3</sup> Blueberry Breeding and Genomics Lab, Horticultural Sciences Department, University of Florida, Gainesville, FL 32611, USA

<sup>4</sup> IFAS Gulf Coast Research and Education Center, University of Florida, 14625 CR 672, Wimauma, FL 33598, USA

<sup>5</sup> Institut de Recerca i Tecnologia Agroalimentàries (IRTA), 08193 Barcelona, Spain

<sup>6</sup> ICREA, Passeig de Lluís Companys 23, 08010 Barcelona, Spain

**\* Correspondence:**

Corresponding authors:

[laura.zingaretti@cragenomica.es](mailto:laura.zingaretti@cragenomica.es)

[miguel.perez@uab.es](mailto:miguel.perez@uab.es)

**Figure S1:** a) Principal component (PC) representation of the strawberry genotypes, each season (T2, T4, T6, T8 and T10) is in a different color; b) Principal component representation of the blueberry genotypes, training and validation individuals are colored differently.

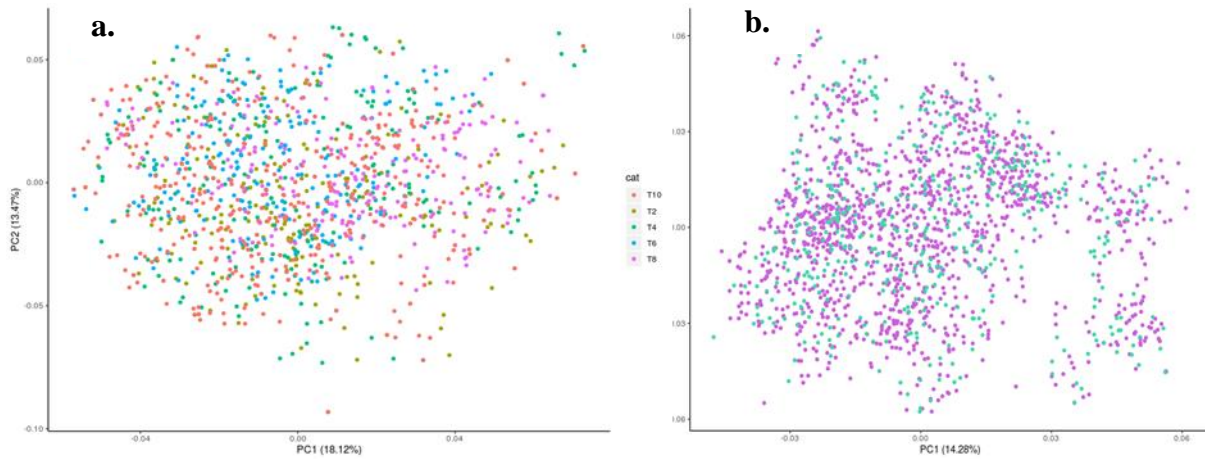

Supplement: Image_1.pdf [file Image_1.pdf]
